# Supplementary material for: Telemedizin in der Schlaganfallversorgung – versorgungsrelevant für Deutschland
Source: Springer Nature journal article supplement (doi:10.1007/s00115-021-01137-6), 2021-05-27
Supplement: MOESM1 [file 19202746]

## Telestroke-Netzwerke Bestandsaufnahme

|                               |  |
|-------------------------------|--|
| Netzwerk                      |  |
| Ärztlicher Leiter/Koordinator |  |
| Klinikum                      |  |
| Telefonnummer                 |  |
| E-Mail-Adresse                |  |
| Startjahr                     |  |

### Basis

---

#### 1. Anzahl Zentren

\_\_\_\_\_

Zentrum 1: \_\_\_\_\_  überregionale SU  regionale SU  EVT

Zentrum 2: \_\_\_\_\_  überregionale SU  regionale SU  EVT

Zentrum 3: \_\_\_\_\_  überregionale SU  regionale SU  EVT

Zentrum 4: \_\_\_\_\_  überregionale SU  regionale SU  EVT

Zentrum 5: \_\_\_\_\_  überregionale SU  regionale SU  EVT

Zentrum 6: \_\_\_\_\_  überregionale SU  regionale SU  EVT

- Möglichkeit weitere Zentren einzugeben -

---

#### 2. Bundesland/-länder

\_\_\_\_\_  länderübergreifend

Einzugsgebiet: \_\_\_\_\_ qkm

\_\_\_\_\_ Einwohner (im Einzugsgebiet/Kreis der telemedizinisch  
angeschlossenen Kliniken, ohne Zentren)

Flächendeckung im Einzugsgebiet  ja  nein

---

### 3. Kooperationskliniken

Anzahl \_\_\_\_\_

Bitte Details zu den einzelnen Kliniken in die zusätzliche Tabelle einpflegen.

Anzahl weiterer Kliniken im Einzugsgebiet, die nicht Teil des Netzwerks sind:  
\_\_\_\_\_internist., \_\_\_\_\_neurolog., mit EVT-Kapazität: \_\_\_\_\_

---

### 4. Netzwerk-Zertifizierung vorhanden

- keine
- Neurovaskuläres Netzwerk nach DSG       Netzwerkzertifizierung nach DIN ISO
- Sonstiges \_\_\_\_\_

## Konsile - Leistungszahlen

---

### 5. Verpflichtende Indikationen für Telekonsil (laut Vereinbarung/Vertrag)

bitte auflisten: \_\_\_\_\_

\_\_\_\_\_  
\_\_\_\_\_

- Fokus auf Schlaganfall
- nur Pat. mit zeitkritischer Therapieoption (def. über Zeitfenster) vs.  jeder Schlaganfall (ohne zeitliche Begrenzung)
- weitere Indikationen außer Schlaganfall (laut Vereinbarung/Vertrag), bitte angeben:  
\_\_\_\_\_
- Neurologische Anfragen außerhalb der o.g. Indikationen werden dennoch bearbeitet;  
bitte konkretisieren: \_\_\_\_\_

---

 6. Behandelte Pat. in den Kooperationskliniken und Konsile gesamt

| Behandelte Pat. gesamt, n | 2017 | 2018 |
|---------------------------|------|------|
| Ischäm. Schlaganfall, n   |      |      |
| TIA, n                    |      |      |
| Hirnblutungen, n          |      |      |

|                                            | 2017 | 2018 |
|--------------------------------------------|------|------|
| Anzahl Telekonsile, n                      |      |      |
| Schlaganfalldiagnosen, n (%) <sup>1</sup>  |      |      |
| - Ischäm. Schlaganfall, n (%) <sup>2</sup> |      |      |
| - System. Lysen, n (%) <sup>3</sup>        |      |      |
| - TIA, n (%) <sup>2</sup>                  |      |      |
| - Hirnblutungen, n (%) <sup>2</sup>        |      |      |
| Andere Diagnosen, n (%) <sup>1</sup>       |      |      |
| Verlegungen, n (%) <sup>1</sup>            |      |      |
| Verlegungen zur EVT, n (%) <sup>1</sup>    |      |      |

Prozentangaben beziehen sich auf: <sup>1</sup> Telekonsile, <sup>2</sup> Schlaganfalldiagnosen, <sup>3</sup> Ischäm. SA

---

 7. Behandelte Schlaganfallpatienten in den Zentren (Zahlen 2018)

| Zentrum (analog zu Pkt.1):   | 1 | 2 | 3 | 4 | 5 | 6 | gesamt |
|------------------------------|---|---|---|---|---|---|--------|
| Schlaganfalldiagnosen, n     |   |   |   |   |   |   |        |
| - Ischäm.Schlaganfall, n (%) |   |   |   |   |   |   |        |
| - System. Lysen, n (%)       |   |   |   |   |   |   |        |
| - TIA, n (%)                 |   |   |   |   |   |   |        |
| - Hirnblutungen, n (%)       |   |   |   |   |   |   |        |

Möglichkeit weitere Zentren einzugeben

---

## 8. Leistungszahlen Endovaskuläre Therapie (2018)

Leistungszahlen EVT vorhanden?  ja  nein

Teilnahme an QS für EVT?  ja  nein wenn ja, welche: \_\_\_\_\_

Anzahl EVTs in den Zentren gesamt: \_\_\_\_\_; davon verlegt aus dem Netzwerk, n (%)  
\_\_\_\_\_

Anzahl Patienten aus Kooperationskliniken, die eine EVT erhielten, n (%), (bezogen auf alle ischämischen Schlaganfälle in den Koop.kliniken): \_\_\_\_\_

Leistungszahlen zu Verlegungszeiten/Transportlogistik vorhanden  ja  nein

EVT-Konzept:  drip&ship  mothership  flying intervention team  Sonstiges: \_\_\_\_\_

---

## 9. Wissenschaftliche Aktivität

keine wissenschaftliche Aktivität

regelhafte begleitende wissenschaftliche Auswertung, durch (z.B: Institut) \_\_\_\_\_

Effizienzanalyse erfolgt/geplant: \_\_\_\_\_

laufende prospektive wissenschaftliche Studie: \_\_\_\_\_

\_\_\_\_\_

\_\_\_\_\_

Datenbank zur Nutzung für gezielte Fragestellungen vorhanden

## Koordination/Netzwerkarbeit

---

### 10. Mitarbeiter aller Zentren

Bitte als Stellenanteil (z.B.1,0 VK) angeben, der für das Netzwerk tätig ist bzw. über Netzwerk finanziert wird

Anzahl gesamt \_\_\_\_\_ VK  Ärztl. Leiter/in \_\_\_\_\_  weitere ärztl. MA \_\_\_\_\_

wissenschaftl. MA \_\_\_\_\_  Geschäftsstelle \_\_\_\_\_  Pflegeexperte/in \_\_\_\_\_

Therapeut/in \_\_\_\_\_  medizin. Dokumentationsassistent/in \_\_\_\_\_  sonstige \_\_\_\_\_

---

### 11. Dienstsysteem des Telekonsildienstes

Telekonsildienst 24/7  ja  nein, \_\_\_\_\_

Durch  Assistenzarzt  Facharztstandard  Facharzt  Oberarzt

Stellenanteil: Regelarbeitszeit \_\_\_\_VK, exklusiv für Telekonsildienst  ja  nein

Dienstzeit \_\_\_\_VK, exklusiv für Telekonsildienst  ja  nein

Sonstiges: \_\_\_\_\_

Wenn mehr als 1 Zentrum, Rotation des Konsildienstes?  ja  nein

Einbindung Neuroradiologie  Telekonsildienst  jederzeit kontaktierbar

sonstiges: \_\_\_\_\_

Einbindung Neurochirurgie  Telekonsildienst  jederzeit kontaktierbar  Erstellung eines eigenen Konsils  sonstiges: \_\_\_\_\_

## 12. Netzwerkarbeit

Audits vor Ort: Frequenz \_\_\_\_\_

Inhalt:  Überprüfung Standards/Struktur/Prozesse  Präsentation Qualitätszahlen

Sonstiges: \_\_\_\_\_

Gemeinsame Visiten in der Koop.klinik?  ja  nein

Fortbildungen ärztlich: im Zentrum \_\_\_\_\_ x/Jahr, vor Ort \_\_\_\_\_ x/Jahr

Fortbildungen Pflege: im Zentrum \_\_\_\_\_ x/Jahr, vor Ort \_\_\_\_\_ x/Jahr

Fortbildungen Physio/Logo/Ergo: im Zentrum \_\_\_\_\_ x/Jahr, vor Ort \_\_\_\_\_ x/Jahr

Netzwerktreffen  ja  nein wenn ja, wie oft: \_\_\_\_\_

Kooperation mit dem Rettungsdienst (z.B. Teilnahme an Netzwerktreffen, Konzept für EVT-Verlegungen, Schulungen des RD, Auswertung Verlegungszeiten etc)  ja  nein

Wenn ja, bitte konkretisieren: \_\_\_\_\_

## Standards/SOPs

### 13. SOP-Entwicklung

Welche SOPs/Leitlinien werden konkret benutzt?

SOPs/Leitlinien der Fachgesellschaften; welche (DGN, AHA/ASA, ESO): \_\_\_\_\_

Es wurden eigene SOPs entwickelt/die obigen Leitlinien wurden übernommen und angepasst

Keine spezifischen, verschriftlichten Leitlinien. Die Empfehlungen richten sich nach der besten klinischen Praxis.

Werden die Partnerkliniken in die Leitlinienauswahl/-erstellung einbezogen?  ja  nein

---

#### 14. Spezifische SOPs

SOPs vorhanden für:

Akuttherapie ischämischer Schlaganfall:  ja  nein

Systemische Thrombolysen  ja  nein

Mechanische Rekanalisation  ja  nein

Sekundärprävention ischämischer Schlaganfall:  ja  nein

Akuttherapie hämorrhagischer Schlaganfall:  ja  nein

Weitere SOPs zerebrovaskuläre Krankheiten: \_\_\_\_\_

Weitere SOPs andere neurologische Krankheiten: \_\_\_\_\_

Wie erfolgt das Verlegungsmanagement?  standardisierte Reihenfolge/SOP  
 ad hoc-Auswahl durch Dienstarzt

---

#### 15. Umsetzung aktueller Studienergebnisse

Wird in Ihrem Netzwerk Folgendes empfohlen/durchgeführt?

Sekundärprävention nach CHANCE/POINT:  ja  nein

Erweitertes Thrombektomiefenster nach DAWN/DEFUSE:  ja, wird regelmäßig durchgeführt  prinzipiell ja, aber Perfusionsoftware für CT/MRT steht meist nicht zur Verfügung  nein, wird nicht empfohlen

Systemische Lysetherapie nach WAKE-UP/EXTEND-Kriterien:  ja, wird regelmäßig durchgeführt  prinzipiell ja, aber MRT/ Perfusionsoftware für CT steht meist nicht zur Verfügung  nein, wird nicht empfohlen

Interventioneller PFO-Verschluss bei Pat. <60J mit kryptogenem Schlaganfall und mindestens mittelgroßem Shuntvolumen/Nachweis Vorhofseptumaneurysma:  ja  nein

---

#### 16. Qualitätssicherung im Netzwerk

Wird durchgeführt  ja  nein

wenn ja,  bei allen telemedizinisch vorgestellten Pat.  bei allen Schlaganfallpat.

- jährlich    andere Frequenz \_\_\_\_\_
- Stichprobe, bitte beschreiben: \_\_\_\_\_
- Papierbögen    elektronisch, welche Software: \_\_\_\_\_
- Verantwortlich für Dateneingabe:  Zentrum    Koop.klinik
- Kliniken nehmen teil an regulärer verpflichtender QS  ja    nein   wenn ja, welche: \_\_\_\_\_
- Wenn nein, welche Parameter werden erfasst:  analog zu ADSR    andere: \_\_\_\_\_
- \_\_\_\_\_

## Finanzierung

---

### 17. Finanzierung des/der Zentrums/Zentren

- Krankenkasse (z.B. Rahmenvertrag),    fallbezogen, \_\_\_\_\_€
- Landeszuschuss    fallbezogen, \_\_\_\_\_€
- Finanzierung durch Umlage
- Kooperationsklinik bezahlt Abschlag/Gebühr: , \_\_\_\_\_€
- Sonstiges, \_\_\_\_\_

---

### 18. Finanzierung der Kooperationsklinik

- OPS 8.98b
- Anzahl an internistischen Kooperationskliniken, die die Voraussetzungen für die OPS 8.98b grundsätzlich erfüllen: \_\_\_\_\_
- Anzahl an Patienten bei denen die OPS 8.98b kodiert wird, n (%) (bezogen auf alle Schlaganfallpatienten in den Kooperationskliniken 2018): \_\_\_\_\_
- Krankenkasse (z.B. Rahmenvertrag),    fallbezogen, \_\_\_\_\_€
- Sonstiges, \_\_\_\_\_

---

### 19. Investitionen

Hardware, Software sowohl im Zentrum als auch in den Kooperationskliniken

- Förderung, durch \_\_\_\_\_    Eigenleistung der Klinik
- Sonstiges, \_\_\_\_\_

## Technik

---

### 20. Systeme

MEYTEC:  Videokonferenz  Bildübertragung  Konsilerstellung

Andere: \_\_\_\_\_  Videokonferenz  Bildübertragung  Konsilerstellung

\_\_\_\_\_  Videokonferenz  Bildübertragung  Konsilerstellung

\_\_\_\_\_  Videokonferenz  Bildübertragung  Konsilerstellung

Bei anderen Anbietern als MEYTEC bitte Kontaktdaten angeben:

---



---

### 21. Technische Ausstattung

Internetanbindung/Bandbreite Zentrum: \_\_\_\_\_ Mbit/s\* Kliniken: \_\_\_\_\_ Mbit/s\* (\* wenn bekannt Up- & Downstream)

Nutzung  der Krankenhausleitung  gesonderte Leitung

Angaben zu Hardware: PC \_\_\_\_\_

Laptop \_\_\_\_\_

Letzte Erneuerung der Hardware (Jahr): \_\_\_\_\_

Betriebssystem: \_\_\_\_\_

Transfer-Modul MEYTEC in Verwendung  ja  nein

Bildgebung in PACS der Zentren übertragbar  ja  nein

Technische Lösung für Qualitätssicherung  ja  nein wenn ja, welche: \_\_\_\_\_

---

### 22. Schriftliches Konsil

Word-Dokument  generiertes pdf

digital übertragbar  in KIS der Koop.klinik integrierbar

in KIS des Zentrums integrierbar (z.B. nach Verlegung)

Informationen werden standardisiert in einer Datenbank erfasst  ja  nein

Wenn ja, welche Software:  MEYTEC  Excel – Tabelle  Sonstiges: \_\_\_\_\_
